# Supplementary material for: Hierarchical architecture of WS2nanosheets on graphene frameworks with enhanced electrochemical properties for lithium storage and hydrogen evolution
Source: Royal Society of Chemistry journal article supplement (doi:10.1039/c5ta06840a), 2015-01-01
Supplement: c5ta06840a1.pdf [file c5ta06840a1.pdf]

## Electronic Supplementary Information

### **Hierarchical architecture of WS<sub>2</sub> nanosheet on graphene framework with enhanced electrochemical properties for lithium storage and hydrogen evolution**

Guowei Huang,<sup>a</sup> Hao Liu,<sup>b</sup> Shengping Wang,<sup>a</sup> Xi Yang,<sup>a</sup> Binhong Liu,<sup>b</sup> Hongzheng Chen<sup>a</sup>  
and Mingsheng Xu\*<sup>a</sup>

<sup>a</sup>*State Key Laboratory of Silicon Materials, MOE Key Laboratory of Macromolecular Synthesis and Functionalization, Department of Polymer Science and Engineering, Zhejiang University, Hangzhou 310027, P. R. China. E-mail: msxu@zju.edu.cn*

<sup>b</sup>*School of Materials Science and Engineering, Zhejiang University, Hangzhou 310027, P. R. China*

### **Experimental Section**

*Materials Characterization:* The structure features of GO nanosheets were investigated using a Veeco Multimode atomic force microscope (AFM) in the tapping mode. Sample was prepared by drop-drying from a GO suspension (1 mg mL<sup>-1</sup>) onto a fresh mica slide. X-ray diffraction (XRD) was carried out using a Rigaku D/Max Ultima IV X-ray powder diffractometer operating at 40 kV, 40 mA for Cu K $\alpha$  radiation ( $\lambda = 1.5418 \text{ \AA}$ ). Samples were prepared by drop-drying a water suspension of the product onto glass substrates. Raman spectra were taken using a Raman spectrometer with a laser excitation wavelength of 532 nm. To calibrate the wavenumber, the Si peak at 520 cm<sup>-1</sup> was used as a reference. The morphology and composition of the WS<sub>2</sub>/3DG hybrids were characterized using a Hitachi S-4800 field emission scanning electron microscope (FESEM) and a FEI TECNAI G2 F20-TWIN transmission electron microscope (TEM) equipped with Energy dispersive X-ray spectroscopy (EDS). Thermogravimetric analysis (TGA) was performed using a Q500 thermoanalyzer with a heating rate of 10 °C min<sup>-1</sup> in air atmosphere. Nitrogen adsorption-desorption isotherm measurements were recorded using an AUTOSORB-IQ2-MP to study

specific surface area. Before analysis, the samples were degassed at room temperature to avoid further thermal reduction or decomposition of 3DG.<sup>1</sup> X-ray photoelectron spectroscopy (XPS) was performed using ESCALAB 250Xi system with Al K $\alpha$  as the source and the C 1s peak at 284.8 eV as an internal standard.

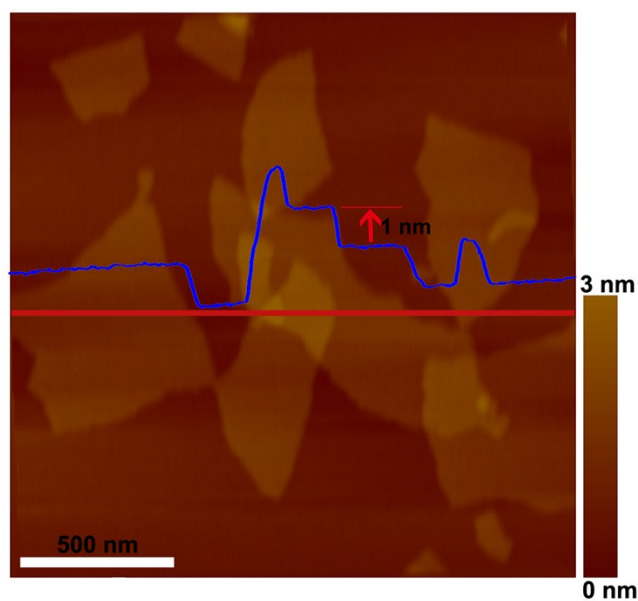

**Fig. S1** AFM image of GO nanosheets, suggesting uniform thickness of about 1 nm.

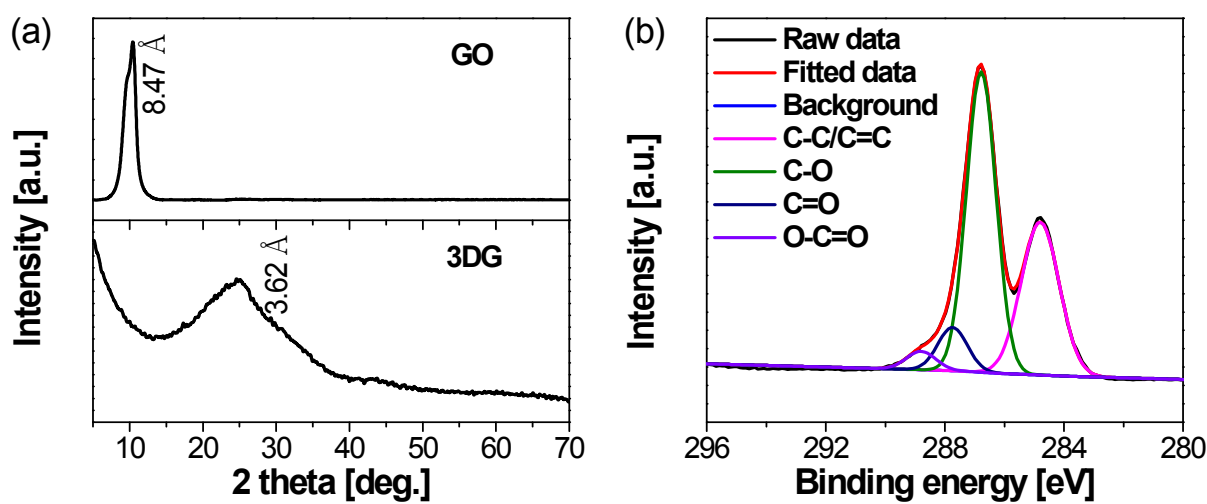

**Fig. S2** a) XRD patterns of GO and 3DG. b) C1s XPS of GO.

XRD was carried out with a scan rate of  $5^\circ \text{ min}^{-1}$  in the range of  $5\text{-}80^\circ$ . The diffraction peak at  $10.4^\circ$  of GO implies an interlayer spacing of  $8.47 \text{ \AA}$ , which may result from the water molecules trapped between oxygen-containing functional groups on GO sheets.<sup>2</sup>

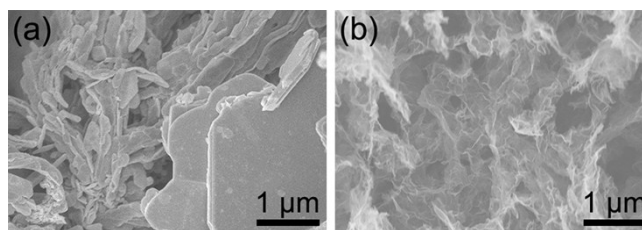

**Fig. S3** SEM images of a) bulk WS<sub>2</sub> powder and b) 3DG.

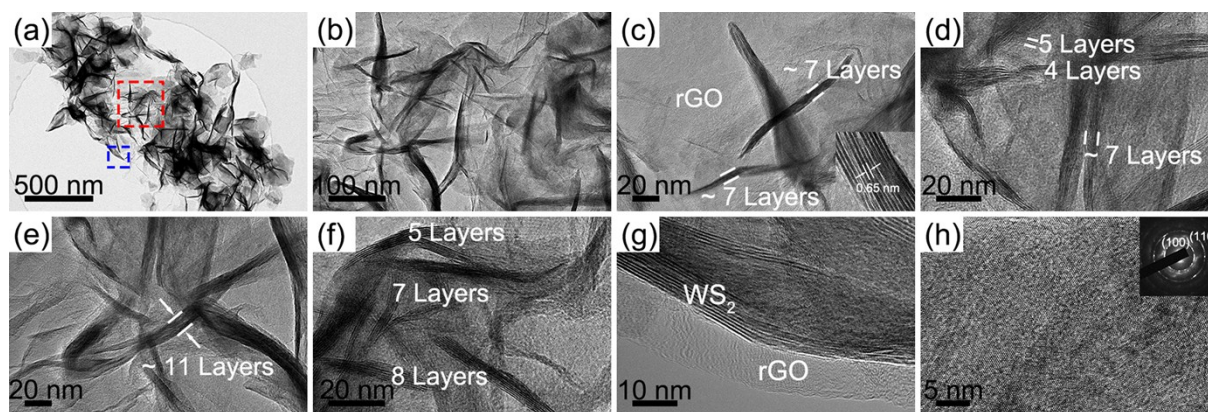

**Fig. S4** TEM images of annealed WS<sub>2</sub>/3DG. a) As-prepared annealed WS<sub>2</sub>/3DG and b) the magnified image of the area marked by red square in (a). c-f) The high-resolution images of (b). The inset in (c) indicates the interlayer spacing of WS<sub>2</sub> is 0.65 nm. g-h) The high-resolution images of the area marked by blue square in (a). The inset in (h) shows the diffraction pattern of 2H-WS<sub>2</sub>.

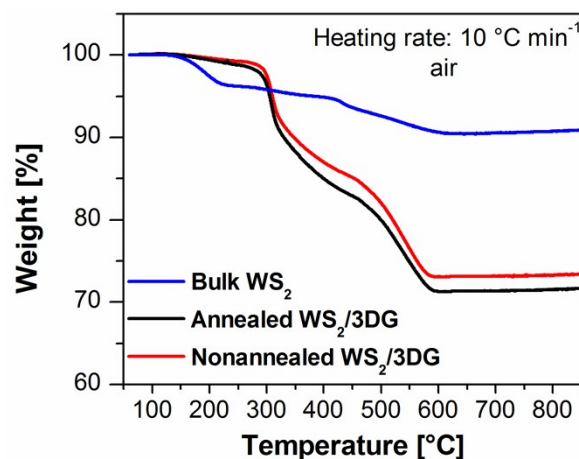

**Fig. S5** Thermogravimetric analysis (TGA) curves of bulk WS<sub>2</sub>, annealed WS<sub>2</sub>/3DG, and nonannealed WS<sub>2</sub>/3DG.

To determine the weight percentage of WS<sub>2</sub> in WS<sub>2</sub>/3DG composites, thermogravimetric analysis (TGA) was performed on bulk WS<sub>2</sub> and WS<sub>2</sub>/3DG nanocomposites (Fig. S5). The content of WS<sub>2</sub> in the annealed sample can be calculated from the equation below

$$\text{WS}_2 \text{ (wt\%)} = 100\% * (\text{wt\% of composite sample at } 800 \text{ }^\circ\text{C}) / (\text{wt\% of bulk WS}_2 \text{ at } 800 \text{ }^\circ\text{C})$$

It is ascertained that there is approximately 21.1 wt% rGO and 78.9 wt% WS<sub>2</sub> in the annealed WS<sub>2</sub>/3DG sample. But for nonannealed sample, it is difficult to resolve the weight percentage of WS<sub>2</sub> because of the oxygen incorporation in this circumstance.

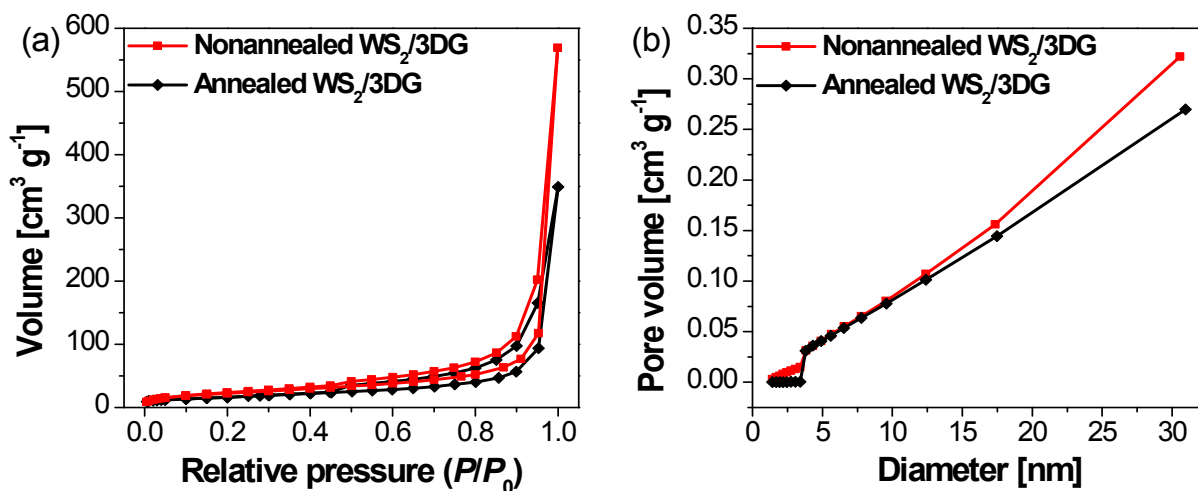

**Fig. S6** a) Nitrogen adsorption/desorption isotherms of nonannealed WS<sub>2</sub>/3DG and annealed WS<sub>2</sub>/3DG, possessing specific surface areas of 82.3 m<sup>2</sup> g<sup>-1</sup> and 59.9 m<sup>2</sup> g<sup>-1</sup>, respectively. b) Pore size distributions of both samples in the range of 1-30 nm.

The porous nature of WS<sub>2</sub>/3DG macrostructures was further characterized by the nitrogen physisorption measurements (Fig. S6). As mentioned in the Experimental Section, the samples were degassed at room temperature to avoid thermal reduction or decomposition of 3DG. Therefore, their specific surface areas could be underestimated because of incomplete degassing before surface analysis. Indeed, it is more accurate and reliable to determine the intrinsic specific surface area via methylene blue (MB) dye adsorption method under the pristine wet conditions of WS<sub>2</sub>/3DG.<sup>1,3</sup> Nevertheless, the results definitely demonstrate higher BET surface area for nonannealed WS<sub>2</sub>/3DG. Barrett-Joyner-Halenda (BJH) calculations reveal that the pore size distributions of both composites are in the range of 1-30 nm, except for the conspicuous macropores presented in the SEM images.

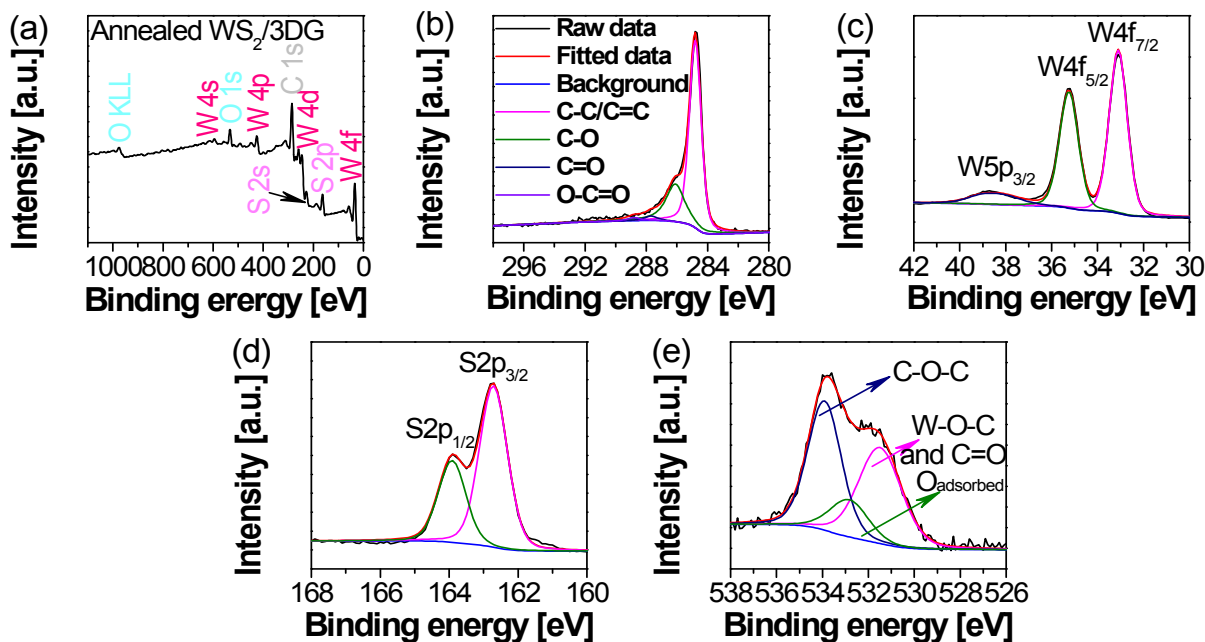

**Fig. S7** XPS patterns of annealed  $\text{WS}_2/\text{3DG}$  sample: a) survey and high-resolution of b) C1s, c) W4f, d) S2p, and e) O1s.

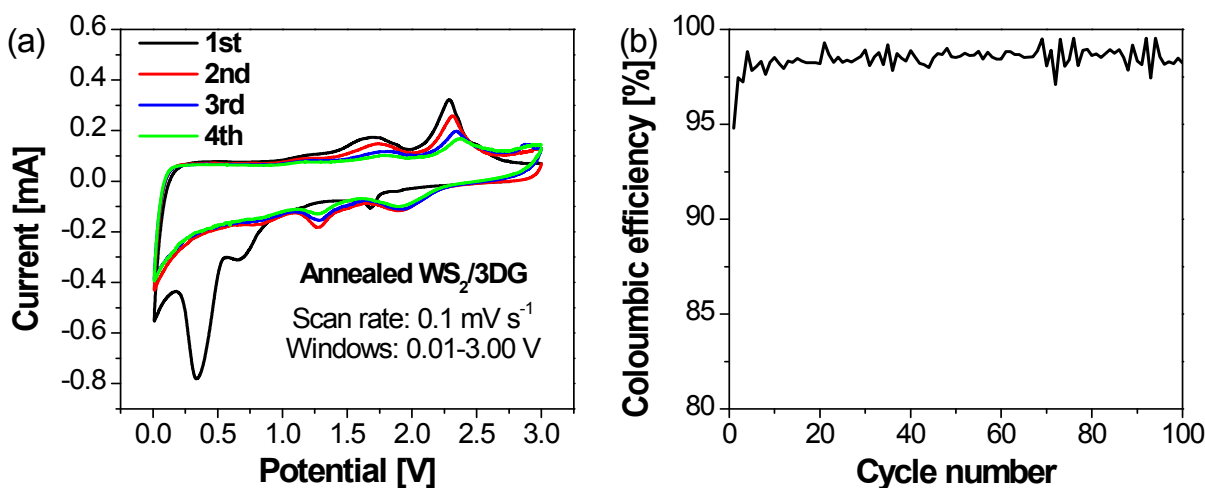

**Fig. S8** a) Cyclic voltammogram of annealed  $\text{WS}_2/\text{3DG}$  at a scan rate of  $0.1 \text{ mV s}^{-1}$  for four cycles. b) Coulombic efficiency of nonannealed  $\text{WS}_2/\text{3DG}$  composite cycled at a current density of  $100 \text{ mA g}^{-1}$ .

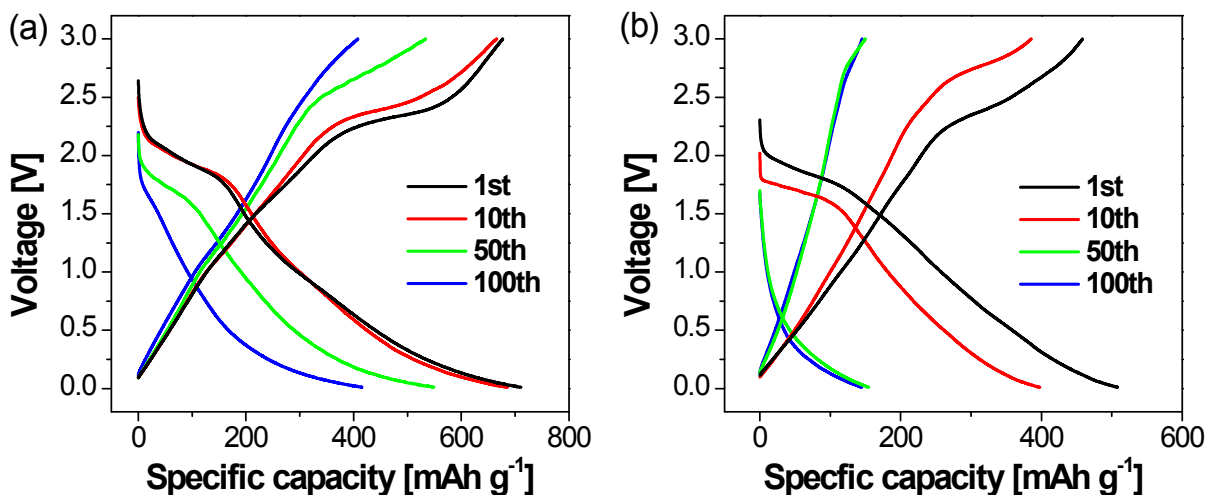

**Fig. S9** Discharge-charge voltage profiles of a) annealed  $\text{WS}_2/3\text{DG}$  and b) bulk  $\text{WS}_2$  during cycling at a current density of  $100 \text{ mA g}^{-1}$ .

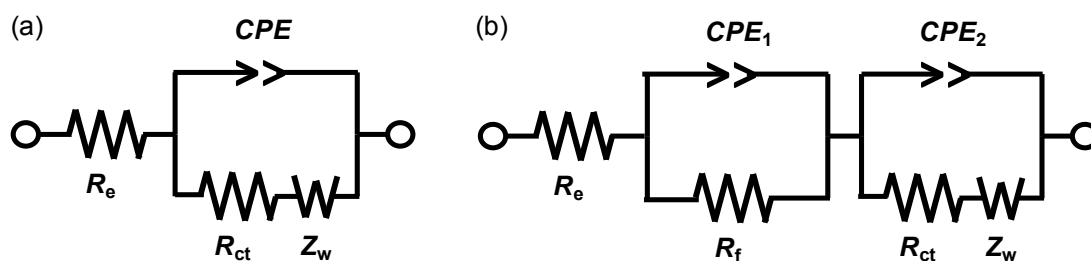

**Fig. S10** Randles equivalent circuits for nonannealed  $\text{WS}_2/3\text{DG}$ , annealed  $\text{WS}_2/3\text{DG}$ , and bulk  $\text{WS}_2$  electrode/electrolyte interface a) before cycling and b) after 100 cycles.  $R_e$  and  $CPE$  are related to the electrolyte resistance and corresponding constant phase element.  $R_f$  and  $R_{ct}$  are the resistance of SEI film and charge-transfer, respectively, while  $Z_w$  represents the Warburg impedance associated with lithium ion diffusion.



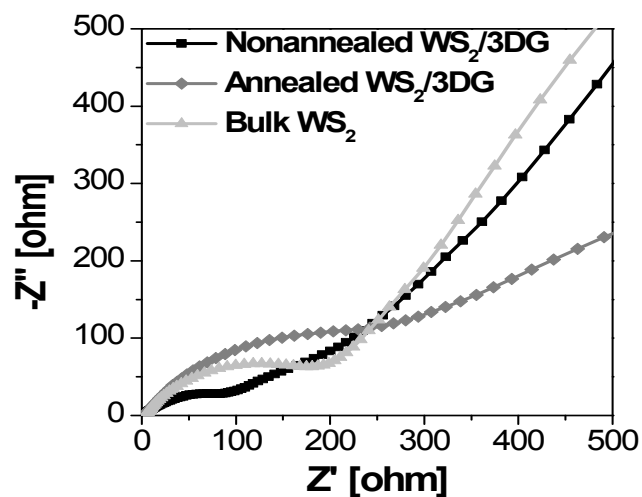

**Fig. S11** Nyquist plots of nonannealed WS<sub>2</sub>/3DG, annealed WS<sub>2</sub>/3DG, and bulk WS<sub>2</sub> electrodes obtained at open potential after 100 cycles.

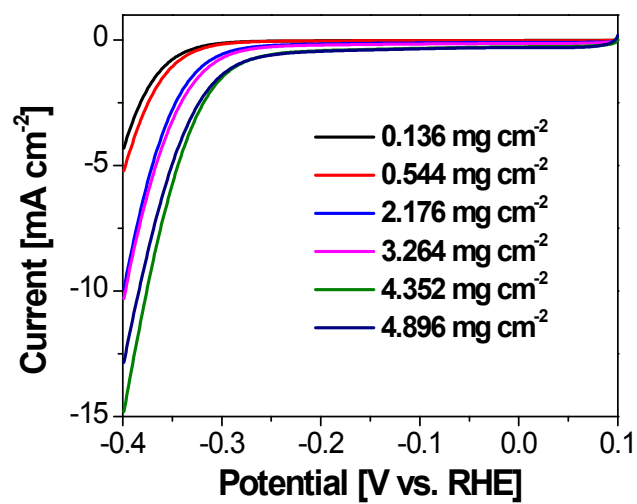

**Fig. S12** Polarization curves of nonannealed WS<sub>2</sub>/3DG powder at different loading weight.

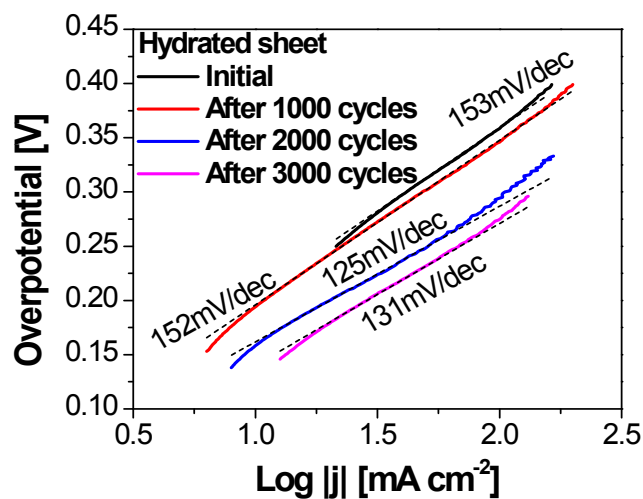

**Fig. S13** Tafel plots of hydrated sheet before and after different CV cycles.

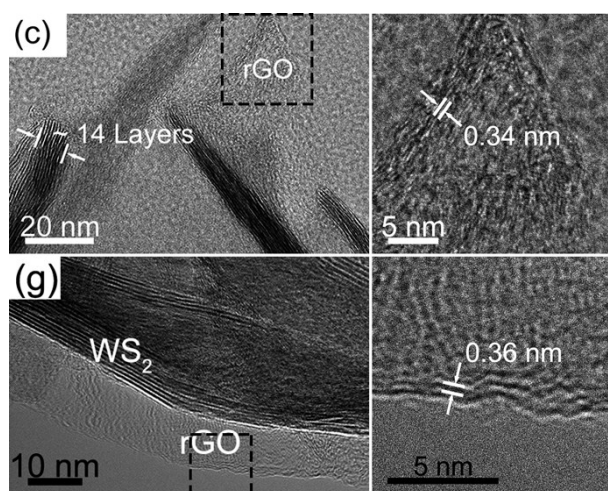

**Fig. S14** Corresponding magnified HRTEM images of Fig. 3c and Fig. S4g.

The above figure shows that the interlayer spacings of rGO in both the WS<sub>2</sub>/3DG composites are estimated to be close to the (002) lattice distance in hexagonal graphite (0.34 nm).

**Table S1** Elemental analyses of nonannealed WS<sub>2</sub>/3DG and annealed WS<sub>2</sub>/3DG

| Sample            |                                  | Nonannealed WS <sub>2</sub> /3DG | Annealed WS <sub>2</sub> /3DG |
|-------------------|----------------------------------|----------------------------------|-------------------------------|
| Atom% of oxygen   |                                  | 12.77                            | 10.62                         |
| Atom ratio of W/S | by XPS                           | 1:2.14                           | 1:2.15                        |
|                   | by EDS                           | 1:1.91                           | 1:2.01                        |
| W species (atom%) | W <sup>(IV)</sup> S <sub>2</sub> | 61.2                             | 100                           |
|                   | W <sup>(IV)</sup> O <sub>2</sub> | 20.2                             | -                             |
|                   | W <sup>(VI)</sup> O <sub>3</sub> | 18.6                             | -                             |
| O species (atom%) | W-O                              | 7.6                              | -                             |
|                   | W-O-C                            | 9.8                              | 41.4                          |
|                   | O <sub>adsorbed</sub>            | 47.3                             | 14.5                          |
|                   | C-O-C                            | 35.3                             | 44.1                          |

It is worth pointing out that the data in the above table were obtained on average from several measurements of the same sample, especially concerning the extreme surface sensitivity of XPS characterization. In contrast with the annealed WS<sub>2</sub>/3DG, the nonannealed counterpart is prone to adsorb adventitious oxygen components (47.3% O<sub>adsorbed</sub>) from the atmosphere, which may render itself more susceptible to oxidation as indicated in the manuscript. Consequently, the ratios of W species would deviate from the exact values of this composite. For instance, some part of the W<sup>(IV)</sup>S<sub>2</sub> species could be assigned as the components of W<sup>(IV)</sup>O<sub>2</sub> species. Therefore, it is more appropriate to estimate the ratios of W species through the EDX results rather than the XPS results. From this perspective, the oxygen-incorporated WS<sub>2</sub> nanosheets in the nonannealed composite can be tentatively derived as WS<sub>1.91</sub>O<sub>0.09</sub>, that is, approximately 5% oxygen incorporated in the lattice of intrinsic WS<sub>2</sub> nanosheets.

**Table S2** Summary of discharge capacity of various WS<sub>2</sub>-based anodes.

| WS <sub>2</sub> -based anode                   | Discharge capacity<br>[mAh g <sup>-1</sup> ] | Voltage<br>range<br>[V] | Current<br>density<br>[mA g <sup>-1</sup> ] | Reference            |
|------------------------------------------------|----------------------------------------------|-------------------------|---------------------------------------------|----------------------|
| <b>Nonannealed WS<sub>2</sub>/3DG</b>          | <b>766 (after 100<br/>cycles)</b>            | <b>0.01-3.0</b>         | <b>100</b>                                  | <b>This<br/>work</b> |
| WS <sub>2</sub> /rGO paper                     | 697.7 (after 100<br>cycles)                  | 0.01-3.0                | 100                                         | 4                    |
| Freeze-dried WS <sub>2</sub> /rGO              | 647 (after 80 cycles)                        | 0.01-3.0                | 350                                         | 5                    |
| WS <sub>2</sub> -rGO composite                 | 451 (after 50 cycles)                        | 0.01-3.0                | 100                                         | 6                    |
| Few-layer WS <sub>2</sub> /N-doped rGO         | 830 (after 100 cycles)                       | 0.01-3.0                | 100                                         | 7                    |
| WS <sub>2</sub> nanotube/3DG                   | 500.2 (after 100<br>cycles)                  | 0.01-3.0                | 100                                         | 8                    |
| WS <sub>2</sub> /SWCNT paper                   | 861.6 (after 50<br>cycles)                   | 0.01-3.0                | 100                                         | 9                    |
| Amorphous WS <sub>2</sub> /carbon<br>composite | 555 (after 50 cycles)                        | 0.001-3.0               | 100                                         | 10                   |

**Table S3** Impedance parameters derived from corresponding equivalent circuit model for different electrodes.

| <b>Sample</b>                                     | <b>R<sub>e</sub></b><br><b>(<math>\Omega</math>)</b> | <b>R<sub>f</sub></b><br><b>(<math>\Omega</math>)</b> | <b>R<sub>ct</sub></b><br><b>(<math>\Omega</math>)</b> |
|---------------------------------------------------|------------------------------------------------------|------------------------------------------------------|-------------------------------------------------------|
| Nonannealed WS <sub>2</sub> /3DG (before cycling) | 2.9                                                  | -                                                    | 42.8                                                  |
| Annealed WS <sub>2</sub> /3DG (before cycling)    | 2.5                                                  | -                                                    | 94.9                                                  |
| Bulk WS <sub>2</sub> (before cycling)             | 2.0                                                  | -                                                    | 136.4                                                 |
| Nonannealed WS <sub>2</sub> /3DG (100th)          | 2.3                                                  | 98.3                                                 | 29.7                                                  |
| Bulk WS <sub>2</sub> (100th)                      | 4.2                                                  | 103.0                                                | 55.9                                                  |

**Table S4** A brief survey of WS<sub>2</sub> and MoS<sub>2</sub> HER electrocatalysts reported in literature.

| Catalyst                                                  | Catalyst loading [mg cm <sup>-2</sup> ] | 2D/3D <sup>a)</sup> | Onset overpotential [mV] <sup>b)</sup> | Tafel slope [mV/dec] | $\eta@300V$ [mA cm <sup>-2</sup> ] | Reference        |
|-----------------------------------------------------------|-----------------------------------------|---------------------|----------------------------------------|----------------------|------------------------------------|------------------|
| <b>WS<sub>2</sub>/3DG</b>                                 | <b>&gt;10</b>                           | <b>3D</b>           | <b>~75</b>                             | <b>131</b>           | <b>137</b>                         | <b>This work</b> |
| Vertical WS <sub>2</sub> nanosheets on carbon cloth       | 1.5                                     | 3D                  | ~150                                   | 105                  | ~30                                | 11               |
| Porous WS <sub>2</sub> thin film on W foil                | ~0.08                                   | 3D                  | ~100                                   | 67                   | ~22                                | 12               |
| WS <sub>2</sub> /rGO nanosheets                           | 0.4                                     | 2D                  | 150-200                                | 58                   | 23                                 | 13               |
| Mono-layered WS <sub>2</sub> /rGO nanosheets              | ~0.562                                  | 2D                  | ~100                                   | 52                   | N/A                                | 14               |
| Ultrathin WS <sub>2</sub> nanoflakes                      | 0.35                                    | 2D                  | 100                                    | 48                   | N/A                                | 15               |
| Strained chemically exfoliated WS <sub>2</sub> nanosheets | 0.1-0.2                                 | 2D                  | 30-60                                  | ~60                  | 26                                 | 16               |
| Metallic WS <sub>2</sub> nanosheets                       | 1±0.2                                   | 2D                  | 75                                     | 70                   | N/A                                | 17               |
| Amorphous MoS <sub>x</sub> NPs coated sponge              | N/A                                     | 3D                  | ~0                                     | 185                  | 232                                | 18               |

|                                                                                  |       |    |         |      |       |    |
|----------------------------------------------------------------------------------|-------|----|---------|------|-------|----|
| Amorphous MoS <sub>x</sub><br>NPs on 3DG/Ni                                      | 8.09  | 3D | 109-141 | 42.8 | ~140  | 19 |
| Porous MoS <sub>2</sub> thin<br>film on Mo foil                                  | N/A   | 3D | 150-200 | 50   | 18.6  | 20 |
| Defect-rich ultrathin<br>MoS <sub>2</sub> nanosheets                             | 0.285 | 2D | 120     | 50   | 70    | 21 |
| Oxygen-incorporated<br>MoS <sub>2</sub> nanosheets                               | 0.285 | 2D | 120     | 55   | 126.5 | 22 |
| Vertical MoS <sub>2</sub><br>nanosheets on<br>amorphous carbon                   | 0.28  | 2D | 80      | 40   | ~160  | 23 |
| Vertical single-<br>layered MoS <sub>2</sub> on N-<br>doped carbon<br>nanofibers | 0.79  | 2D | 30      | 38   | ~70   | 24 |
| MoS <sub>2</sub> NPs on<br>mesoporous<br>grapheme foams                          | 0.21  | 2D | ~100    | ~42  | N/A   | 25 |

<sup>a)</sup> 2D represents that the working electrode was made by casting on the glass carbon electrode, while 3D electrode works straightly; <sup>b)</sup> All potentials were converted to the reversible hydrogen electrode (RHE) scale.

## References

- [S1] S. H. Aboutalebi, R. Jalili, D. Esrafilzadeh, M. Salari, Z. Gholamvand, S. A. Yamini, K. Konstantinov, R. L. Shepherd, J. Chen, S. E. Moulton, P. C. Innis, A. I. Minett, J. M. Razal and G. G. Wallace, *ACS Nano* 2014, **8**, 2456.

- [S2] A. M. Abdelkader, *J. Mater. Chem. A* 2015, **3**, 8519.
- [S3] Y. X. Xu, Z. Y. Lin, X. Zhong, B. Papandrea, Y. Huang and X. F. Duan, *Angew. Chem., Int. Ed.* 2015, **54**, 5345.
- [S4] Y. Liu, W. Wang, Y. W. Wang and X. S. Peng, *Nano Energy* 2014, **7**, 25.
- [S5] X. D. Xu, C. S. Rout, J. Yang, R. G. Cao, P. Oh, H. S. Shin and J. Cho, *J. Mater. Chem. A* 2013, **1**, 14548.
- [S6] K. Shiva, H. S. S. Ramakrishna Matte, H. B. Rajendra, A. J. Bhattacharyya and C. N. R. Rao, *Nano Energy* 2013, **2**, 787.
- [S7] D. Y. Chen, G. Ji, B. Ding, Y. Ma, B. H. Qu, W. X. Chen and J. Y. Lee, *Nanoscale* 2013, **5**, 7890.
- [S8] R. J. Chen, T. Zhao, W. P. Wu, F. Wu, L. Li, J. Qian, R. Xu, H. M. Wu, H. M. Albishri, A. S. Al-Bogami, D. A. El-Hady, J. Lu and K. Amine, *Nano Lett.* 2014, **14**, 5899.
- [S9] Y. Liu, W. Wang, H. B. Huang, L. Gu, Y. W. Wang and X. S. Peng, *Chem. Commun.* 2014, **50**, 4485.
- [S10] S. H. Choi, S. J. Boo, J. H. Lee and Y. C. Kang, *Sci. Rep.* 2014, **4**, 5755.
- [S11] Y. Yan, B. Y. Xia, N. Li, Z. C. Xu, A. Fisher and X. Wang, *J. Mater. Chem. A* 2014, **3**, 131.
- [S12] H. L. Fei, Y. Yang, X. J. Fan, G. Wang, G. D. Ruan and J. M. Tour, *J. Mater. Chem. A* 2015, **3**, 5798.
- [S13] J. Yang, D. Voiry, S. J. Ahn, D. Kang, A. Y. Kim, M. Chhowalla and H. S. Shin, *Angew. Chem., Int. Ed.* 2013, **52**, 13751.
- [S14] J. Zhang, Q. Wang, L. H. Wang, X. A. Li and W. Huang, *Nanoscale* 2015, **7**, 10391.
- [S15] L. Cheng, W. J. Huang, Q. F. Gong, C. H. Liu, Z. Liu, Y. G. Li and H. J. Dai, *Angew. Chem., Int. Ed.* 2014, **53**, 7860.
- [S16] D. Voiry, H. Yamaguchi, J. W. Li, R. Silva, D. C. Alves, T. Fujita, M. W. Chen, T. Asefa, V. B. Shenoy, G. Eda and M. Chhowalla, *Nat. Mater.* 2013, **12**, 850.



- [S17] M. A. Lukowski, A. S. Daniel, C. R. English, F. Meng, A. Forticaux, R. J. Hamers and S. Jin, *Energy Environ. Sci.* 2014, **7**, 2608.
- [S18] Y. H. Chang, F. Y. Wu, T. Y. Chen, C. L. Hsu, C. H. Chen, F. Wiryo, K. H. Wei and C. Y. Chiang, L. J. Li, *Small* 2014, **10**, 895.
- [S19] Y. H. Chang, C. T. Lin, T. Y. Chen, C. L. Hsu, Y. H. Lee, W. J. Zhang, K. H. Wei and L. J. Li, *Adv. Mater.* 2013, **25**, 756.
- [S20] Y. Yang, H. L. Fei, G. D. Ruan, C. S. Xiang and J. M. Tour, *Adv. Mater.* 2014, **26**, 8163.
- [S21] J. F. Xie, H. Zhang, S. Li, R. X. Wang, X. Sun, M. Zhou, J. F. Zhou, X. W. Lou and Y. Xie, *Adv. Mater.* 2013, **25**, 5807.
- [S22] J. F. Xie, J. J. Zhang, S. Li, F. Grote, X. D. Zhang, H. Zhang, R. X. Wang, Y. Lei, B. C. Pan and Y. Xie, *J. Am. Chem. Soc.* 2013, **135**, 17881.
- [S23] X. Zhao, H. Zhu and X. R. Yang, *Nanoscale* 2014, **6**, 10680.
- [S24] H. Zhu, M. L. Du, M. Zhang, M. L. Zou, T. T. Yang, S. L. Wang, J. M. Yao and B. C. Guo, *Chem. Commun.* 2014, **50**, 15435.
- [S25] L. Liao, J. Zhu, X. J. Bian, L. N. Zhu, M. D. Scanlon, H. H. Girault and B. H. Liu, *Adv. Funct. Mater.* 2013, **23**, 5326.
